# Supplementary material for: Epidemiological transition in morbidity: 10-year data from emergency consultations in Dakar, Senegal
Source: PubMed Central journal article supplement — BMJ Glob Health. 2019 Jul 19;4(4):e001396. doi: 10.1136/bmjgh-2019-001396 (PMC6666800; doi:10.1136/bmjgh-2019-001396), 2019-07-19
Supplement: bmjgh-2019-001396supp001.pdf [file bmjgh-2019-001396supp001.pdf]

1 **Supplemental Data**

2 **Supplemental Table 1: Percent of change for each disease across the 10 years in Africans and None-Africans**

3

4 **All Participants**

|                                                                                                            | <b>2005</b> | <b>2006</b> | <b>2007</b> | <b>2008</b> | <b>2009</b> | <b>2010</b> | <b>2011</b> | <b>2012</b> | <b>2013</b> | <b>2014</b> |
|------------------------------------------------------------------------------------------------------------|-------------|-------------|-------------|-------------|-------------|-------------|-------------|-------------|-------------|-------------|
| <b>Infectious and parasitic diseases</b>                                                                   | 27.1%       | 24.2%       | 22.0%       | 22.5%       | 17.5%       | 16.7%       | 15.2%       | 14.8%       | 12.9%       | 12.1%       |
| <b>Neoplasms</b>                                                                                           | 0.0%        | 0.0%        | 0.0%        | 0.0%        | 0.0%        | 0.0%        | 0.1%        | 0.0%        | 0.0%        | 0.0%        |
| <b>Diseases of the blood and blood-forming organs and certain disorders involving the immune mechanism</b> | 0.2%        | 0.3%        | 0.1%        | 0.2%        | 0.1%        | 0.2%        | 0.2%        | 0.2%        | 0.2%        | 0.2%        |
| <b>Endocrine, nutritional and metabolic diseases</b>                                                       | 0.5%        | 0.5%        | 0.6%        | 0.7%        | 0.6%        | 0.9%        | 1.0%        | 1.2%        | 1.0%        | 1.1%        |
| <b>Mental and behavioral disorders</b>                                                                     | 3.2%        | 3.3%        | 3.0%        | 3.1%        | 3.4%        | 3.5%        | 3.4%        | 2.5%        | 2.7%        | 2.4%        |
| <b>Diseases of the nervous system</b>                                                                      | 0.7%        | 0.9%        | 0.8%        | 0.7%        | 0.8%        | 0.7%        | 0.9%        | 0.9%        | 0.9%        | 1.0%        |
| <b>Diseases of the eye and adnexa</b>                                                                      | 0.7%        | 0.5%        | 0.7%        | 0.6%        | 0.3%        | 0.7%        | 1.0%        | 0.7%        | 1.0%        | 0.9%        |
| <b>Diseases of the ear and mastoid process</b>                                                             | 5.7%        | 5.0%        | 4.6%        | 4.0%        | 4.1%        | 2.6%        | 2.7%        | 2.6%        | 2.7%        | 2.5%        |
| <b>Diseases of the circulatory system</b>                                                                  | 1.9%        | 2.8%        | 2.3%        | 2.5%        | 2.6%        | 2.2%        | 2.5%        | 3.1%        | 2.7%        | 2.8%        |
| <b>Diseases of the respiratory system</b>                                                                  | 22.8%       | 25.8%       | 28.8%       | 28.6%       | 29.0%       | 27.8%       | 27.1%       | 28.0%       | 29.3%       | 28.0%       |
| <b>Diseases of the digestive system</b>                                                                    | 2.6%        | 2.5%        | 2.3%        | 3.4%        | 4.0%        | 4.0%        | 4.7%        | 3.6%        | 4.3%        | 4.0%        |
| <b>Diseases of the skin and subcutaneous tissue</b>                                                        | 3.9%        | 3.0%        | 3.4%        | 3.1%        | 2.8%        | 2.4%        | 2.5%        | 2.4%        | 2.7%        | 2.5%        |
| <b>Diseases of the musculoskeletal system and connective tissue</b>                                        | 2.4%        | 2.5%        | 3.0%        | 3.4%        | 3.1%        | 2.6%        | 2.9%        | 3.7%        | 3.9%        | 4.4%        |
| <b>Diseases of the genitourinary system</b>                                                                | 2.8%        | 3.2%        | 3.2%        | 2.5%        | 2.1%        | 1.7%        | 2.1%        | 2.2%        | 1.9%        | 2.5%        |
| <b>Pregnancy, childbirth and the puerperium</b>                                                            | 0.2%        | 0.2%        | 0.1%        | 0.1%        | 0.1%        | 0.2%        | 0.1%        | 0.2%        | 0.1%        | 0.1%        |
| <b>Congenital malformations, deformations and chromosomal abnormalities</b>                                | 0.0%        | 0.0%        | 0.0%        | 0.0%        | 0.0%        | 0.0%        | 0.0%        | 0.0%        | 0.0%        | 0.0%        |
| <b>Symptoms, signs and abnormal clinical and laboratory findings, not elsewhere classified</b>             | 11.2%       | 12.2%       | 12.0%       | 12.6%       | 18.6%       | 23.9%       | 22.9%       | 23.4%       | 22.9%       | 22.5%       |
| <b>Injury, poisoning and certain other consequences of external causes</b>                                 | 9.3%        | 10.4%       | 10.3%       | 8.2%        | 7.9%        | 7.9%        | 8.5%        | 8.2%        | 7.5%        | 7.1%        |
| <b>Factors influencing health status and contact with health services</b>                                  | 5.0%        | 2.5%        | 3.0%        | 3.7%        | 3.0%        | 2.0%        | 2.2%        | 2.2%        | 3.4%        | 5.7%        |

5

6

7

1 **Women**

|                                                                                                            | <b>2005</b> | <b>2006</b> | <b>2007</b> | <b>2008</b> | <b>2009</b> | <b>2010</b> | <b>2011</b> | <b>2012</b> | <b>2013</b> | <b>2014</b> |
|------------------------------------------------------------------------------------------------------------|-------------|-------------|-------------|-------------|-------------|-------------|-------------|-------------|-------------|-------------|
| <b>Infectious and parasitic diseases</b>                                                                   | 27.5%       | 24.4%       | 22.0%       | 22.4%       | 17.6%       | 16.5%       | 15.0%       | 15.0%       | 13.1%       | 12.3%       |
| <b>Neoplasms</b>                                                                                           | 0.0%        | 0.0%        | 0.0%        | 0.0%        | 0.0%        | 0.0%        | 0.2%        | 0.0%        | 0.0%        | 0.0%        |
| <b>Diseases of the blood and blood-forming organs and certain disorders involving the immune mechanism</b> | 0.2%        | 0.3%        | 0.1%        | 0.1%        | 0.2%        | 0.3%        | 0.1%        | 0.2%        | 0.2%        | 0.2%        |
| <b>Endocrine, nutritional and metabolic diseases</b>                                                       | 0.4%        | 0.5%        | 0.6%        | 0.8%        | 0.5%        | 0.9%        | 1.3%        | 1.1%        | 0.7%        | 1.2%        |
| <b>Mental and behavioral disorders</b>                                                                     | 4.4%        | 4.4%        | 3.8%        | 4.1%        | 4.6%        | 4.7%        | 4.6%        | 3.3%        | 3.5%        | 3.4%        |
| <b>Diseases of the nervous system</b>                                                                      | 0.7%        | 0.9%        | 0.7%        | 0.6%        | 0.6%        | 0.8%        | 0.9%        | 0.9%        | 0.8%        | 0.8%        |
| <b>Diseases of the eye and adnexa</b>                                                                      | 0.8%        | 0.5%        | 0.5%        | 0.6%        | 0.3%        | 0.5%        | 1.1%        | 0.7%        | 1.0%        | 0.9%        |
| <b>Diseases of the ear and mastoid process</b>                                                             | 4.9%        | 4.6%        | 4.0%        | 3.7%        | 3.6%        | 2.3%        | 2.4%        | 2.3%        | 2.5%        | 2.5%        |
| <b>Diseases of the circulatory system</b>                                                                  | 2.0%        | 2.8%        | 2.3%        | 1.8%        | 2.3%        | 2.0%        | 2.6%        | 2.9%        | 2.2%        | 2.6%        |
| <b>Diseases of the respiratory system</b>                                                                  | 23.0%       | 25.5%       | 29.2%       | 28.8%       | 28.6%       | 27.5%       | 26.8%       | 27.9%       | 28.8%       | 26.5%       |
| <b>Diseases of the digestive system</b>                                                                    | 2.6%        | 2.6%        | 2.2%        | 3.5%        | 4.1%        | 3.9%        | 4.8%        | 3.4%        | 4.3%        | 4.1%        |
| <b>Diseases of the skin and subcutaneous tissue</b>                                                        | 3.9%        | 2.6%        | 3.2%        | 3.2%        | 2.6%        | 2.4%        | 2.3%        | 2.3%        | 2.5%        | 2.3%        |
| <b>Diseases of the musculoskeletal system and connective tissue</b>                                        | 2.2%        | 2.8%        | 3.1%        | 3.5%        | 3.1%        | 2.5%        | 2.7%        | 3.8%        | 3.7%        | 4.5%        |
| <b>Diseases of the genitourinary system</b>                                                                | 3.4%        | 3.7%        | 3.8%        | 3.0%        | 2.6%        | 2.1%        | 2.2%        | 2.5%        | 2.1%        | 3.0%        |
| <b>Pregnancy, childbirth and the puerperium</b>                                                            | 0.3%        | 0.4%        | 0.1%        | 0.2%        | 0.2%        | 0.3%        | 0.3%        | 0.3%        | 0.2%        | 0.2%        |
| <b>Congenital malformations, deformations and chromosomal abnormalities</b>                                | 0.0%        | 0.0%        | 0.0%        | 0.0%        | 0.0%        | 0.0%        | 0.0%        | 0.0%        | 0.0%        | 0.0%        |
| <b>Symptoms, signs and abnormal clinical and laboratory findings, not elsewhere classified</b>             | 11.6%       | 12.8%       | 12.6%       | 13.1%       | 19.1%       | 25.1%       | 23.5%       | 24.3%       | 24.9%       | 24.2%       |
| <b>Injury, poisoning and certain other consequences of external causes</b>                                 | 7.6%        | 9.0%        | 8.8%        | 7.5%        | 7.4%        | 6.5%        | 7.0%        | 6.7%        | 6.1%        | 6.0%        |
| <b>Factors influencing health status and contact with health services</b>                                  | 4.6%        | 2.2%        | 2.9%        | 3.2%        | 2.6%        | 1.8%        | 2.2%        | 2.3%        | 3.2%        | 5.3%        |

## 1 Men

|                                                                                                            | 2005  | 2006  | 2007  | 2008  | 2009  | 2010  | 2011  | 2012  | 2013  | 2014  |
|------------------------------------------------------------------------------------------------------------|-------|-------|-------|-------|-------|-------|-------|-------|-------|-------|
| <b>Infectious and parasitic diseases</b>                                                                   | 26.6% | 24.0% | 22.1% | 22.6% | 17.5% | 17.0% | 15.5% | 14.6% | 12.7% | 11.9% |
| <b>Neoplasms</b>                                                                                           | 0.0%  | 0.0%  | 0.0%  | 0.1%  | 0.0%  | 0.0%  | 0.0%  | 0.0%  | 0.0%  | 0.0%  |
| <b>Diseases of the blood and blood-forming organs and certain disorders involving the immune mechanism</b> | 0.1%  | 0.2%  | 0.1%  | 0.2%  | 0.1%  | 0.1%  | 0.2%  | 0.2%  | 0.2%  | 0.1%  |
| <b>Endocrine, nutritional and metabolic diseases</b>                                                       | 0.5%  | 0.5%  | 0.6%  | 0.7%  | 0.7%  | 0.9%  | 0.7%  | 1.2%  | 1.3%  | 1.1%  |
| <b>Mental and behavioral disorders</b>                                                                     | 1.9%  | 2.2%  | 2.1%  | 2.0%  | 2.1%  | 2.0%  | 1.9%  | 1.5%  | 1.6%  | 1.3%  |
| <b>Diseases of the nervous system</b>                                                                      | 0.8%  | 0.9%  | 0.8%  | 0.8%  | 1.0%  | 0.6%  | 0.9%  | 0.9%  | 0.9%  | 1.1%  |
| <b>Diseases of the eye and adnexa</b>                                                                      | 0.6%  | 0.6%  | 0.8%  | 0.5%  | 0.3%  | 0.9%  | 0.9%  | 0.8%  | 1.0%  | 1.0%  |
| <b>Diseases of the ear and mastoid process</b>                                                             | 6.6%  | 5.5%  | 5.1%  | 4.3%  | 4.6%  | 2.9%  | 3.0%  | 2.9%  | 2.9%  | 2.5%  |
| <b>Diseases of the circulatory system</b>                                                                  | 1.7%  | 2.9%  | 2.3%  | 3.2%  | 2.9%  | 2.3%  | 2.4%  | 3.4%  | 3.2%  | 3.0%  |
| <b>Diseases of the respiratory system</b>                                                                  | 22.6% | 26.1% | 28.5% | 28.4% | 29.3% | 28.3% | 27.5% | 28.2% | 29.9% | 29.8% |
| <b>Diseases of the digestive system</b>                                                                    | 2.6%  | 2.4%  | 2.4%  | 3.3%  | 3.9%  | 4.2%  | 4.7%  | 3.8%  | 4.2%  | 4.0%  |
| <b>Diseases of the skin and subcutaneous tissue</b>                                                        | 3.8%  | 3.4%  | 3.7%  | 3.1%  | 3.1%  | 2.5%  | 2.8%  | 2.6%  | 2.9%  | 2.7%  |
| <b>Diseases of the musculoskeletal system and connective tissue</b>                                        | 2.7%  | 2.3%  | 2.8%  | 3.3%  | 3.2%  | 2.8%  | 3.0%  | 3.6%  | 4.0%  | 4.2%  |
| <b>Diseases of the genitourinary system</b>                                                                | 2.1%  | 2.6%  | 2.5%  | 2.1%  | 1.5%  | 1.2%  | 1.9%  | 1.8%  | 1.7%  | 2.0%  |
| <b>Pregnancy, childbirth and the puerperium</b>                                                            | 0.0%  | 0.0%  | 0.0%  | 0.0%  | 0.0%  | 0.0%  | 0.0%  | 0.0%  | 0.0%  | 0.0%  |
| <b>Congenital malformations, deformations and chromosomal abnormalities</b>                                | 0.0%  | 0.0%  | 0.0%  | 0.0%  | 0.0%  | 0.0%  | 0.0%  | 0.0%  | 0.0%  | 0.0%  |
| <b>Symptoms, signs and abnormal clinical and laboratory findings, not elsewhere classified</b>             | 10.8% | 11.6% | 11.3% | 12.0% | 18.0% | 22.6% | 22.2% | 22.2% | 20.5% | 20.5% |
| <b>Injury, poisoning and certain other consequences of external causes</b>                                 | 11.2% | 11.9% | 11.8% | 9.1%  | 8.4%  | 9.5%  | 10.1% | 10.1% | 9.2%  | 8.5%  |
| <b>Factors influencing health status and contact with health services</b>                                  | 5.3%  | 2.8%  | 3.1%  | 4.3%  | 3.4%  | 2.3%  | 2.3%  | 2.2%  | 3.8%  | 6.2%  |

1 **Supplemental Table 2: Percent of change for each disease across the 10 years in Africans**

2

3 **All Participants**

|                                                                                                            | <b>2005</b> | <b>2006</b> | <b>2007</b> | <b>2008</b> | <b>2009</b> | <b>2010</b> | <b>2011</b> | <b>2012</b> | <b>2013</b> | <b>2014</b> |
|------------------------------------------------------------------------------------------------------------|-------------|-------------|-------------|-------------|-------------|-------------|-------------|-------------|-------------|-------------|
| <b>Infectious and parasitic diseases</b>                                                                   | 27.3%       | 21.2%       | 19.6%       | 20.9%       | 15.1%       | 14.9%       | 13.9%       | 12.8%       | 10.8%       | 10.6%       |
| <b>Neoplasms</b>                                                                                           | 0.0%        | 0.1%        | 0.0%        | 0.0%        | 0.0%        | 0.0%        | 0.1%        | 0.0%        | 0.0%        | 0.0%        |
| <b>Diseases of the blood and blood-forming organs and certain disorders involving the immune mechanism</b> | 0.3%        | 0.6%        | 0.2%        | 0.3%        | 0.3%        | 0.3%        | 0.2%        | 0.3%        | 0.3%        | 0.3%        |
| <b>Endocrine, nutritional and metabolic diseases</b>                                                       | 1.0%        | 1.1%        | 1.2%        | 1.4%        | 1.0%        | 1.6%        | 1.7%        | 1.9%        | 1.5%        | 1.5%        |
| <b>Mental and behavioral disorders</b>                                                                     | 4.6%        | 5.0%        | 4.6%        | 4.3%        | 5.0%        | 4.6%        | 4.2%        | 2.8%        | 3.2%        | 3.1%        |
| <b>Diseases of the nervous system</b>                                                                      | 1.6%        | 1.6%        | 1.3%        | 1.2%        | 1.2%        | 1.0%        | 1.2%        | 1.3%        | 1.2%        | 1.4%        |
| <b>Diseases of the eye and adnexa</b>                                                                      | 0.3%        | 0.4%        | 0.4%        | 0.4%        | 0.2%        | 0.6%        | 0.6%        | 0.6%        | 0.7%        | 0.7%        |
| <b>Diseases of the ear and mastoid process</b>                                                             | 2.0%        | 2.8%        | 2.7%        | 2.1%        | 2.1%        | 1.7%        | 1.8%        | 1.8%        | 1.4%        | 1.5%        |
| <b>Diseases of the circulatory system</b>                                                                  | 3.6%        | 5.7%        | 4.2%        | 4.3%        | 4.2%        | 3.2%        | 3.7%        | 4.2%        | 3.7%        | 3.9%        |
| <b>Diseases of the respiratory system</b>                                                                  | 17.0%       | 20.0%       | 24.0%       | 24.5%       | 26.5%       | 24.8%       | 25.1%       | 25.8%       | 27.9%       | 26.5%       |
| <b>Diseases of the digestive system</b>                                                                    | 2.6%        | 2.8%        | 2.6%        | 3.2%        | 3.8%        | 4.1%        | 4.8%        | 4.0%        | 4.4%        | 3.9%        |
| <b>Diseases of the skin and subcutaneous tissue</b>                                                        | 2.3%        | 1.6%        | 1.8%        | 1.6%        | 1.7%        | 1.5%        | 1.5%        | 1.6%        | 1.9%        | 1.7%        |
| <b>Diseases of the musculoskeletal system and connective tissue</b>                                        | 1.8%        | 2.3%        | 2.7%        | 3.4%        | 3.1%        | 2.8%        | 2.7%        | 4.1%        | 4.2%        | 4.7%        |
| <b>Diseases of the genitourinary system</b>                                                                | 2.0%        | 2.8%        | 3.1%        | 2.4%        | 1.7%        | 1.5%        | 2.2%        | 2.1%        | 1.9%        | 2.0%        |
| <b>Pregnancy, childbirth and the puerperium</b>                                                            | 0.3%        | 0.4%        | 0.2%        | 0.1%        | 0.2%        | 0.2%        | 0.2%        | 0.3%        | 0.1%        | 0.2%        |
| <b>Congenital malformations, deformations and chromosomal abnormalities</b>                                | 0.0%        | 0.0%        | 0.0%        | 0.0%        | 0.0%        | 0.0%        | 0.0%        | 0.0%        | 0.0%        | 0.0%        |
| <b>Symptoms, signs and abnormal clinical and laboratory findings, not elsewhere classified</b>             | 13.1%       | 16.3%       | 14.9%       | 15.4%       | 22.5%       | 26.5%       | 25.1%       | 26.7%       | 26.2%       | 26.2%       |
| <b>Injury, poisoning and certain other consequences of external causes</b>                                 | 12.5%       | 11.7%       | 12.3%       | 9.4%        | 7.6%        | 8.6%        | 8.9%        | 8.4%        | 7.5%        | 7.0%        |
| <b>Factors influencing health status and contact with health services</b>                                  | 7.7%        | 3.7%        | 4.4%        | 5.2%        | 3.9%        | 2.2%        | 2.0%        | 1.5%        | 3.2%        | 4.8%        |

4

5

6

1 **Women**

|                                                                                                            | <b>2005</b> | <b>2006</b> | <b>2007</b> | <b>2008</b> | <b>2009</b> | <b>2010</b> | <b>2011</b> | <b>2012</b> | <b>2013</b> | <b>2014</b> |
|------------------------------------------------------------------------------------------------------------|-------------|-------------|-------------|-------------|-------------|-------------|-------------|-------------|-------------|-------------|
| <b>Infectious and parasitic diseases</b>                                                                   | 27.5%       | 20.7%       | 18.8%       | 20.3%       | 14.4%       | 14.4%       | 13.7%       | 12.5%       | 10.9%       | 10.6%       |
| <b>Neoplasms</b>                                                                                           | 0.0%        | 0.1%        | 0.0%        | 0.0%        | 0.0%        | 0.0%        | 0.2%        | 0.0%        | 0.0%        | 0.0%        |
| <b>Diseases of the blood and blood-forming organs and certain disorders involving the immune mechanism</b> | 0.2%        | 0.9%        | 0.2%        | 0.2%        | 0.3%        | 0.4%        | 0.2%        | 0.3%        | 0.3%        | 0.3%        |
| <b>Endocrine, nutritional and metabolic diseases</b>                                                       | 0.8%        | 0.9%        | 1.2%        | 1.6%        | 0.8%        | 1.5%        | 2.1%        | 1.8%        | 1.1%        | 1.3%        |
| <b>Mental and behavioral disorders</b>                                                                     | 6.2%        | 6.9%        | 5.9%        | 6.1%        | 6.7%        | 6.5%        | 5.5%        | 3.6%        | 4.2%        | 4.3%        |
| <b>Diseases of the nervous system</b>                                                                      | 1.6%        | 1.2%        | 1.1%        | 0.9%        | 0.9%        | 1.3%        | 1.0%        | 1.3%        | 1.1%        | 1.2%        |
| <b>Diseases of the eye and adnexa</b>                                                                      | 0.3%        | 0.3%        | 0.3%        | 0.3%        | 0.1%        | 0.6%        | 0.7%        | 0.6%        | 0.8%        | 0.7%        |
| <b>Diseases of the ear and mastoid process</b>                                                             | 1.8%        | 3.0%        | 2.7%        | 1.9%        | 1.9%        | 1.6%        | 1.7%        | 1.6%        | 1.4%        | 1.6%        |
| <b>Diseases of the circulatory system</b>                                                                  | 4.4%        | 5.6%        | 4.5%        | 3.6%        | 3.9%        | 3.1%        | 3.9%        | 4.2%        | 3.0%        | 3.6%        |
| <b>Diseases of the respiratory system</b>                                                                  | 16.2%       | 20.1%       | 23.9%       | 24.9%       | 26.0%       | 23.6%       | 24.8%       | 25.5%       | 27.0%       | 24.8%       |
| <b>Diseases of the digestive system</b>                                                                    | 2.7%        | 2.7%        | 2.2%        | 3.6%        | 3.5%        | 4.0%        | 4.7%        | 3.7%        | 4.6%        | 3.9%        |
| <b>Diseases of the skin and subcutaneous tissue</b>                                                        | 2.4%        | 1.9%        | 1.5%        | 1.5%        | 1.7%        | 1.5%        | 1.5%        | 1.8%        | 1.7%        | 1.5%        |
| <b>Diseases of the musculoskeletal system and connective tissue</b>                                        | 1.9%        | 3.1%        | 3.2%        | 3.6%        | 2.8%        | 2.6%        | 2.5%        | 4.5%        | 3.9%        | 5.1%        |
| <b>Diseases of the genitourinary system</b>                                                                | 2.5%        | 3.5%        | 3.8%        | 2.8%        | 2.3%        | 2.1%        | 2.3%        | 2.2%        | 2.2%        | 2.4%        |
| <b>Pregnancy, childbirth and the puerperium</b>                                                            | 0.5%        | 0.7%        | 0.3%        | 0.1%        | 0.4%        | 0.3%        | 0.4%        | 0.5%        | 0.2%        | 0.4%        |
| <b>Congenital malformations, deformations and chromosomal abnormalities</b>                                | 0.0%        | 0.0%        | 0.1%        | 0.0%        | 0.0%        | 0.0%        | 0.0%        | 0.0%        | 0.0%        | 0.0%        |
| <b>Symptoms, signs and abnormal clinical and laboratory findings, not elsewhere classified</b>             | 14.7%       | 16.8%       | 16.1%       | 16.4%       | 23.5%       | 28.1%       | 25.8%       | 27.9%       | 28.7%       | 28.5%       |
| <b>Injury, poisoning and certain other consequences of external causes</b>                                 | 9.5%        | 8.6%        | 9.7%        | 7.5%        | 7.2%        | 6.4%        | 7.3%        | 6.6%        | 5.8%        | 5.5%        |
| <b>Factors influencing health status and contact with health services</b>                                  | 6.7%        | 3.0%        | 4.5%        | 4.7%        | 3.4%        | 2.0%        | 1.7%        | 1.5%        | 3.1%        | 4.3%        |

2

3

1 **Men**

|                                                                                                            | <b>2005</b> | <b>2006</b> | <b>2007</b> | <b>2008</b> | <b>2009</b> | <b>2010</b> | <b>2011</b> | <b>2012</b> | <b>2013</b> | <b>2014</b> |
|------------------------------------------------------------------------------------------------------------|-------------|-------------|-------------|-------------|-------------|-------------|-------------|-------------|-------------|-------------|
| <b>Infectious and parasitic diseases</b>                                                                   | 27.1%       | 21.9%       | 20.4%       | 21.6%       | 15.9%       | 15.5%       | 14.2%       | 13.1%       | 10.6%       | 10.6%       |
| <b>Neoplasms</b>                                                                                           | 0.1%        | 0.1%        | 0.0%        | 0.0%        | 0.0%        | 0.0%        | 0.0%        | 0.0%        | 0.0%        | 0.0%        |
| <b>Diseases of the blood and blood-forming organs and certain disorders involving the immune mechanism</b> | 0.4%        | 0.3%        | 0.1%        | 0.4%        | 0.1%        | 0.1%        | 0.3%        | 0.2%        | 0.2%        | 0.2%        |
| <b>Endocrine, nutritional and metabolic diseases</b>                                                       | 1.1%        | 1.2%        | 1.2%        | 1.3%        | 1.2%        | 1.6%        | 1.2%        | 1.9%        | 2.0%        | 1.7%        |
| <b>Mental and behavioral disorders</b>                                                                     | 2.7%        | 2.7%        | 3.2%        | 2.1%        | 2.8%        | 2.2%        | 2.5%        | 1.7%        | 1.8%        | 1.5%        |
| <b>Diseases of the nervous system</b>                                                                      | 1.5%        | 2.0%        | 1.6%        | 1.5%        | 1.5%        | 0.7%        | 1.4%        | 1.2%        | 1.4%        | 1.7%        |
| <b>Diseases of the eye and adnexa</b>                                                                      | 0.2%        | 0.4%        | 0.5%        | 0.4%        | 0.2%        | 0.7%        | 0.4%        | 0.7%        | 0.5%        | 0.8%        |
| <b>Diseases of the ear and mastoid process</b>                                                             | 2.2%        | 2.5%        | 2.6%        | 2.3%        | 2.3%        | 1.9%        | 2.0%        | 2.0%        | 1.5%        | 1.5%        |
| <b>Diseases of the circulatory system</b>                                                                  | 2.7%        | 5.8%        | 3.9%        | 5.0%        | 4.6%        | 3.3%        | 3.5%        | 4.2%        | 4.5%        | 4.4%        |
| <b>Diseases of the respiratory system</b>                                                                  | 18.0%       | 19.9%       | 24.0%       | 24.0%       | 27.1%       | 26.3%       | 25.5%       | 26.2%       | 29.1%       | 28.6%       |
| <b>Diseases of the digestive system</b>                                                                    | 2.6%        | 2.9%        | 3.0%        | 2.6%        | 4.2%        | 4.2%        | 4.9%        | 4.5%        | 4.1%        | 4.0%        |
| <b>Diseases of the skin and subcutaneous tissue</b>                                                        | 2.3%        | 1.4%        | 2.3%        | 1.6%        | 1.7%        | 1.4%        | 1.5%        | 1.5%        | 2.0%        | 1.9%        |
| <b>Diseases of the musculoskeletal system and connective tissue</b>                                        | 1.7%        | 1.4%        | 2.1%        | 3.2%        | 3.5%        | 2.9%        | 2.9%        | 3.6%        | 4.5%        | 4.3%        |
| <b>Diseases of the genitourinary system</b>                                                                | 1.4%        | 2.0%        | 2.3%        | 2.0%        | 1.0%        | 0.7%        | 2.1%        | 1.9%        | 1.6%        | 1.5%        |
| <b>Pregnancy, childbirth and the puerperium</b>                                                            | 0.0%        | 0.1%        | 0.0%        | 0.1%        | 0.0%        | 0.0%        | 0.0%        | 0.1%        | 0.0%        | 0.0%        |
| <b>Congenital malformations, deformations and chromosomal abnormalities</b>                                | 0.0%        | 0.0%        | 0.0%        | 0.1%        | 0.0%        | 0.0%        | 0.0%        | 0.0%        | 0.0%        | 0.0%        |
| <b>Symptoms, signs and abnormal clinical and laboratory findings, not elsewhere classified</b>             | 11.3%       | 15.6%       | 13.5%       | 14.3%       | 21.2%       | 24.4%       | 24.2%       | 25.1%       | 23.1%       | 23.1%       |
| <b>Injury, poisoning and certain other consequences of external causes</b>                                 | 15.9%       | 15.3%       | 15.0%       | 11.5%       | 8.2%        | 11.4%       | 11.0%       | 10.7%       | 9.8%        | 8.9%        |
| <b>Factors influencing health status and contact with health services</b>                                  | 8.8%        | 4.6%        | 4.3%        | 5.9%        | 4.4%        | 2.6%        | 2.4%        | 1.5%        | 3.4%        | 5.4%        |

1 **Supplemental Table 3: Percent of change for each disease across the 10 years in None-Africans (others)**

2

3 **All Participants**

|                                                                                                            | <b>2005</b> | <b>2006</b> | <b>2007</b> | <b>2008</b> | <b>2009</b> | <b>2010</b> | <b>2011</b> | <b>2012</b> | <b>2013</b> | <b>2014</b> |
|------------------------------------------------------------------------------------------------------------|-------------|-------------|-------------|-------------|-------------|-------------|-------------|-------------|-------------|-------------|
| <b>Infectious and parasitic diseases</b>                                                                   | 26.9%       | 25.8%       | 23.3%       | 23.5%       | 19.5%       | 18.6%       | 16.7%       | 17.4%       | 15.8%       | 14.1%       |
| <b>Neoplasms</b>                                                                                           | 0.0%        | 0.0%        | 0.0%        | 0.0%        | 0.0%        | 0.0%        | 0.1%        | 0.0%        | 0.0%        | 0.0%        |
| <b>Diseases of the blood and blood-forming organs and certain disorders involving the immune mechanism</b> | 0.1%        | 0.1%        | 0.0%        | 0.1%        | 0.0%        | 0.1%        | 0.0%        | 0.2%        | 0.1%        | 0.1%        |
| <b>Endocrine, nutritional and metabolic diseases</b>                                                       | 0.2%        | 0.2%        | 0.3%        | 0.3%        | 0.3%        | 0.2%        | 0.3%        | 0.3%        | 0.3%        | 0.7%        |
| <b>Mental and behavioral disorders</b>                                                                     | 2.5%        | 2.5%        | 2.2%        | 2.4%        | 2.2%        | 2.3%        | 2.4%        | 2.1%        | 2.0%        | 1.5%        |
| <b>Diseases of the nervous system</b>                                                                      | 0.3%        | 0.6%        | 0.5%        | 0.4%        | 0.4%        | 0.4%        | 0.5%        | 0.4%        | 0.3%        | 0.4%        |
| <b>Diseases of the eye and adnexa</b>                                                                      | 0.9%        | 0.6%        | 0.8%        | 0.7%        | 0.4%        | 0.8%        | 1.4%        | 0.9%        | 1.3%        | 1.2%        |
| <b>Diseases of the ear and mastoid process</b>                                                             | 7.6%        | 6.2%        | 5.5%        | 5.1%        | 5.7%        | 3.5%        | 3.6%        | 3.6%        | 4.4%        | 3.8%        |
| <b>Diseases of the circulatory system</b>                                                                  | 1.0%        | 1.3%        | 1.3%        | 1.5%        | 1.3%        | 1.1%        | 1.2%        | 1.7%        | 1.3%        | 1.3%        |
| <b>Diseases of the respiratory system</b>                                                                  | 25.7%       | 28.9%       | 31.3%       | 31.0%       | 30.9%       | 30.9%       | 29.4%       | 30.8%       | 31.1%       | 30.1%       |
| <b>Diseases of the digestive system</b>                                                                    | 2.5%        | 2.3%        | 2.2%        | 3.5%        | 4.1%        | 4.0%        | 4.7%        | 3.1%        | 4.1%        | 4.2%        |
| <b>Diseases of the skin and subcutaneous tissue</b>                                                        | 4.6%        | 3.7%        | 4.2%        | 4.0%        | 3.7%        | 3.4%        | 3.7%        | 3.5%        | 3.7%        | 3.5%        |
| <b>Diseases of the musculoskeletal system and connective tissue</b>                                        | 2.7%        | 2.7%        | 3.1%        | 3.3%        | 3.2%        | 2.5%        | 3.1%        | 3.2%        | 3.5%        | 3.9%        |
| <b>Diseases of the genitourinary system</b>                                                                | 3.2%        | 3.4%        | 3.2%        | 2.6%        | 2.4%        | 1.9%        | 1.9%        | 2.3%        | 2.0%        | 3.2%        |
| <b>Pregnancy, childbirth and the puerperium</b>                                                            | 0.1%        | 0.1%        | 0.0%        | 0.2%        | 0.1%        | 0.1%        | 0.1%        | 0.0%        | 0.2%        | 0.0%        |
| <b>Congenital malformations, deformations and chromosomal abnormalities</b>                                | 0.0%        | 0.0%        | 0.0%        | 0.0%        | 0.0%        | 0.0%        | 0.0%        | 0.0%        | 0.0%        | 0.0%        |
| <b>Symptoms, signs and abnormal clinical and laboratory findings, not elsewhere classified</b>             | 10.3%       | 10.0%       | 10.5%       | 10.9%       | 15.5%       | 21.3%       | 20.4%       | 19.2%       | 18.5%       | 17.7%       |
| <b>Injury, poisoning and certain other consequences of external causes</b>                                 | 7.8%        | 9.8%        | 9.3%        | 7.6%        | 8.1%        | 7.1%        | 8.0%        | 8.0%        | 7.5%        | 7.4%        |
| <b>Factors influencing health status and contact with health services</b>                                  | 3.6%        | 1.8%        | 2.2%        | 2.9%        | 2.3%        | 1.8%        | 2.5%        | 3.2%        | 3.8%        | 7.0%        |

4

1 **Women**

|                                                                                                            | <b>2005</b> | <b>2006</b> | <b>2007</b> | <b>2008</b> | <b>2009</b> | <b>2010</b> | <b>2011</b> | <b>2012</b> | <b>2013</b> | <b>2014</b> |
|------------------------------------------------------------------------------------------------------------|-------------|-------------|-------------|-------------|-------------|-------------|-------------|-------------|-------------|-------------|
| <b>Infectious and parasitic diseases</b>                                                                   | 27.4%       | 26.5%       | 23.7%       | 23.8%       | 20.4%       | 18.8%       | 16.5%       | 18.3%       | 16.3%       | 14.7%       |
| <b>Neoplasms</b>                                                                                           | 0.0%        | 0.0%        | 0.0%        | 0.0%        | 0.0%        | 0.0%        | 0.2%        | 0.0%        | 0.0%        | 0.0%        |
| <b>Diseases of the blood and blood-forming organs and certain disorders involving the immune mechanism</b> | 0.1%        | 0.0%        | 0.0%        | 0.1%        | 0.1%        | 0.1%        | 0.1%        | 0.1%        | 0.1%        | 0.2%        |
| <b>Endocrine, nutritional and metabolic diseases</b>                                                       | 0.2%        | 0.2%        | 0.3%        | 0.3%        | 0.2%        | 0.2%        | 0.3%        | 0.3%        | 0.2%        | 1.0%        |
| <b>Mental and behavioral disorders</b>                                                                     | 3.4%        | 3.0%        | 2.8%        | 2.8%        | 2.8%        | 2.7%        | 3.5%        | 2.8%        | 2.5%        | 2.0%        |
| <b>Diseases of the nervous system</b>                                                                      | 0.2%        | 0.8%        | 0.5%        | 0.4%        | 0.3%        | 0.3%        | 0.7%        | 0.3%        | 0.4%        | 0.4%        |
| <b>Diseases of the eye and adnexa</b>                                                                      | 1.1%        | 0.6%        | 0.6%        | 0.8%        | 0.4%        | 0.5%        | 1.6%        | 0.9%        | 1.2%        | 1.1%        |
| <b>Diseases of the ear and mastoid process</b>                                                             | 6.5%        | 5.5%        | 4.7%        | 4.8%        | 5.1%        | 3.1%        | 3.3%        | 3.3%        | 4.0%        | 3.8%        |
| <b>Diseases of the circulatory system</b>                                                                  | 0.7%        | 1.2%        | 1.1%        | 0.7%        | 0.9%        | 0.9%        | 1.0%        | 1.2%        | 1.0%        | 1.2%        |
| <b>Diseases of the respiratory system</b>                                                                  | 26.6%       | 28.6%       | 32.0%       | 31.2%       | 30.9%       | 31.7%       | 29.2%       | 31.2%       | 31.3%       | 29.0%       |
| <b>Diseases of the digestive system</b>                                                                    | 2.5%        | 2.6%        | 2.2%        | 3.4%        | 4.6%        | 3.8%        | 4.9%        | 3.2%        | 4.0%        | 4.4%        |
| <b>Diseases of the skin and subcutaneous tissue</b>                                                        | 4.7%        | 3.0%        | 4.1%        | 4.2%        | 3.3%        | 3.2%        | 3.3%        | 3.0%        | 3.5%        | 3.4%        |
| <b>Diseases of the musculoskeletal system and connective tissue</b>                                        | 2.3%        | 2.6%        | 3.0%        | 3.4%        | 3.4%        | 2.4%        | 3.1%        | 2.8%        | 3.5%        | 3.7%        |
| <b>Diseases of the genitourinary system</b>                                                                | 3.9%        | 3.8%        | 3.9%        | 3.1%        | 2.8%        | 2.1%        | 2.1%        | 2.9%        | 2.1%        | 3.9%        |
| <b>Pregnancy, childbirth and the puerperium</b>                                                            | 0.3%        | 0.3%        | 0.0%        | 0.3%        | 0.1%        | 0.2%        | 0.1%        | 0.1%        | 0.3%        | 0.0%        |
| <b>Congenital malformations, deformations and chromosomal abnormalities</b>                                | 0.0%        | 0.0%        | 0.0%        | 0.0%        | 0.0%        | 0.0%        | 0.0%        | 0.0%        | 0.0%        | 0.0%        |
| <b>Symptoms, signs and abnormal clinical and laboratory findings, not elsewhere classified</b>             | 10.0%       | 10.4%       | 10.8%       | 11.1%       | 15.2%       | 21.7%       | 20.7%       | 19.5%       | 19.5%       | 17.8%       |
| <b>Injury, poisoning and certain other consequences of external causes</b>                                 | 6.5%        | 9.3%        | 8.2%        | 7.4%        | 7.6%        | 6.7%        | 6.7%        | 6.8%        | 6.5%        | 6.6%        |
| <b>Factors influencing health status and contact with health services</b>                                  | 3.5%        | 1.7%        | 1.9%        | 2.3%        | 1.9%        | 1.6%        | 2.8%        | 3.3%        | 3.4%        | 6.8%        |



1 Men (N=24160)

|                                                                                                            | 2005  | 2006  | 2007  | 2008  | 2009  | 2010  | 2011  | 2012  | 2013  | 2014  |
|------------------------------------------------------------------------------------------------------------|-------|-------|-------|-------|-------|-------|-------|-------|-------|-------|
| <b>Infectious and parasitic diseases</b>                                                                   | 26.4% | 25.0% | 22.9% | 23.2% | 18.6% | 18.4% | 16.9% | 16.4% | 15.2% | 13.4% |
| <b>Neoplasms</b>                                                                                           | 0.0%  | 0.0%  | 0.1%  | 0.1%  | 0.0%  | 0.0%  | 0.0%  | 0.0%  | 0.0%  | 0.0%  |
| <b>Diseases of the blood and blood-forming organs and certain disorders involving the immune mechanism</b> | 0.0%  | 0.2%  | 0.1%  | 0.2%  | 0.0%  | 0.1%  | 0.0%  | 0.3%  | 0.2%  | 0.0%  |
| <b>Endocrine, nutritional and metabolic diseases</b>                                                       | 0.3%  | 0.2%  | 0.3%  | 0.4%  | 0.4%  | 0.2%  | 0.2%  | 0.3%  | 0.4%  | 0.4%  |
| <b>Mental and behavioral disorders</b>                                                                     | 1.6%  | 1.9%  | 1.6%  | 1.9%  | 1.6%  | 1.8%  | 1.4%  | 1.2%  | 1.4%  | 0.9%  |
| <b>Diseases of the nervous system</b>                                                                      | 0.5%  | 0.4%  | 0.5%  | 0.3%  | 0.6%  | 0.5%  | 0.4%  | 0.5%  | 0.3%  | 0.5%  |
| <b>Diseases of the eye and adnexa</b>                                                                      | 0.7%  | 0.7%  | 0.9%  | 0.6%  | 0.3%  | 1.1%  | 1.3%  | 0.8%  | 1.5%  | 1.3%  |
| <b>Diseases of the ear and mastoid process</b>                                                             | 8.6%  | 6.9%  | 6.3%  | 5.4%  | 6.4%  | 3.9%  | 4.0%  | 3.9%  | 4.7%  | 3.8%  |
| <b>Diseases of the circulatory system</b>                                                                  | 1.3%  | 1.5%  | 1.5%  | 2.3%  | 1.6%  | 1.3%  | 1.3%  | 2.4%  | 1.7%  | 1.4%  |
| <b>Diseases of the respiratory system</b>                                                                  | 24.7% | 29.2% | 30.6% | 30.8% | 30.9% | 30.1% | 29.6% | 30.4% | 30.8% | 31.1% |
| <b>Diseases of the digestive system</b>                                                                    | 2.6%  | 2.1%  | 2.2%  | 3.7%  | 3.6%  | 4.2%  | 4.4%  | 3.1%  | 4.3%  | 4.0%  |
| <b>Diseases of the skin and subcutaneous tissue</b>                                                        | 4.5%  | 4.4%  | 4.3%  | 3.9%  | 4.1%  | 3.5%  | 4.2%  | 3.9%  | 4.0%  | 3.5%  |
| <b>Diseases of the musculoskeletal system and connective tissue</b>                                        | 3.1%  | 2.7%  | 3.2%  | 3.3%  | 2.9%  | 2.6%  | 3.1%  | 3.7%  | 3.5%  | 4.2%  |
| <b>Diseases of the genitourinary system</b>                                                                | 2.4%  | 3.0%  | 2.6%  | 2.1%  | 1.9%  | 1.7%  | 1.7%  | 1.6%  | 1.9%  | 2.6%  |
| <b>Pregnancy, childbirth and the puerperium</b>                                                            | 0.0%  | 0.0%  | 0.0%  | 0.0%  | 0.0%  | 0.0%  | 0.0%  | 0.0%  | 0.0%  | 0.0%  |
| <b>Congenital malformations, deformations and chromosomal abnormalities</b>                                | 0.0%  | 0.0%  | 0.0%  | 0.0%  | 0.0%  | 0.0%  | 0.0%  | 0.0%  | 0.0%  | 0.0%  |
| <b>Symptoms, signs and abnormal clinical and laboratory findings, not elsewhere classified</b>             | 10.6% | 9.7%  | 10.2% | 10.7% | 15.8% | 20.9% | 20.2% | 19.0% | 17.4% | 17.6% |
| <b>Injury, poisoning and certain other consequences of external causes</b>                                 | 9.0%  | 10.3% | 10.3% | 7.8%  | 8.6%  | 7.6%  | 9.3%  | 9.4%  | 8.6%  | 8.2%  |
| <b>Factors influencing health status and contact with health services</b>                                  | 3.7%  | 2.0%  | 2.5%  | 3.5%  | 2.7%  | 2.0%  | 2.2%  | 3.0%  | 4.2%  | 7.2%  |

**Supplemental Table 4: The table below shows the distribution of patients served by SOS, by ethnicity/race.**

|                 | <b>2005</b> | <b>2006</b> | <b>2007</b> | <b>2008</b> | <b>2009</b> | <b>2010</b> | <b>2011</b> | <b>2012</b> | <b>2013</b> | <b>2014</b> |
|-----------------|-------------|-------------|-------------|-------------|-------------|-------------|-------------|-------------|-------------|-------------|
| <b>Africans</b> | 33%         | 35%         | 33%         | 37%         | 45%         | 51%         | 53%         | 56%         | 57%         | 57%         |
| <b>Others</b>   | 67%         | 65%         | 67%         | 63%         | 55%         | 49%         | 47%         | 44%         | 43%         | 43%         |

**Supplemental Figure 1. Flow chart**

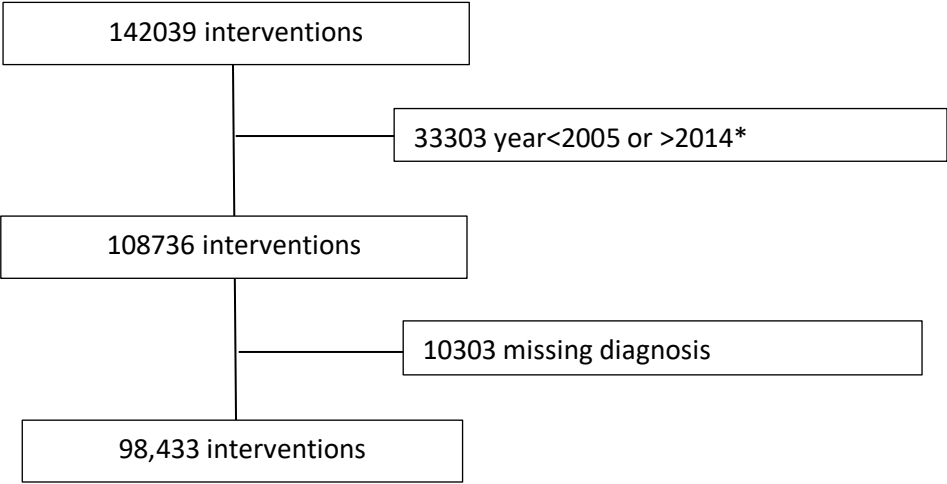

**Supplemental Figure 2: Main categories of emergency medical visits in African men and women by age groups**

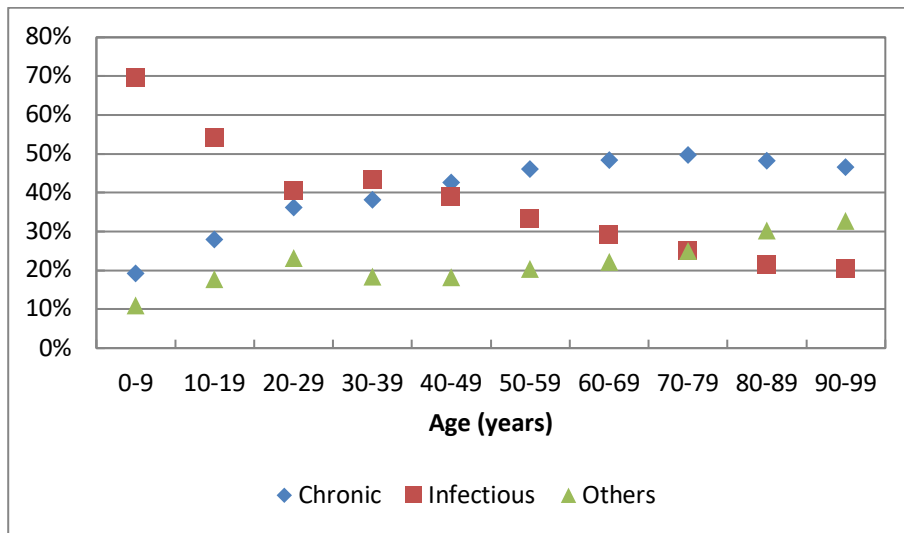

\*Data on 49,702 consultations in African men and women over a 10-year period.

**Supplemental Figure 3. Broad diagnostic categories of emergency medical consultations in African men and women over 10 years in Dakar, Senegal.\***

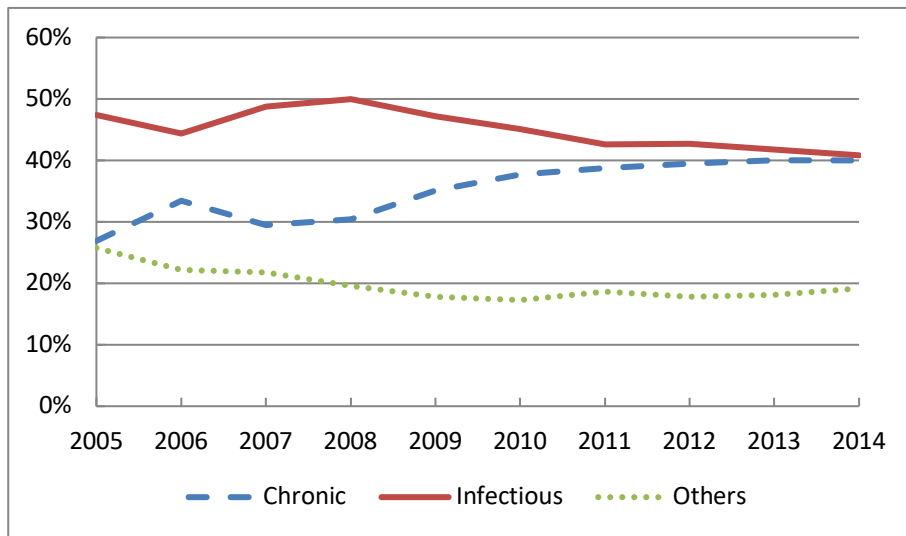

\*Data on 49,702 consultations in African patients over a 10-year period.
